# Supplementary material for: Developmental self-reactivity determines the pathogenic Tc17 differentiation potential of naive CD8+ T cells by adjusting endogenous SMAD3 expression
Source: Research Square preprint supplement (doi:10.21203/rs.3.rs-2827447/v1), 2023-05-01
Supplement: Supplementary file 1 [file 3aea4b2bc73e109c3af8881e.pdf]

**Supplementary information includes:**

Extended Data Figures 1–6

Extended Data Figure legends 1–6

Supplementary Tabela 1 and 2

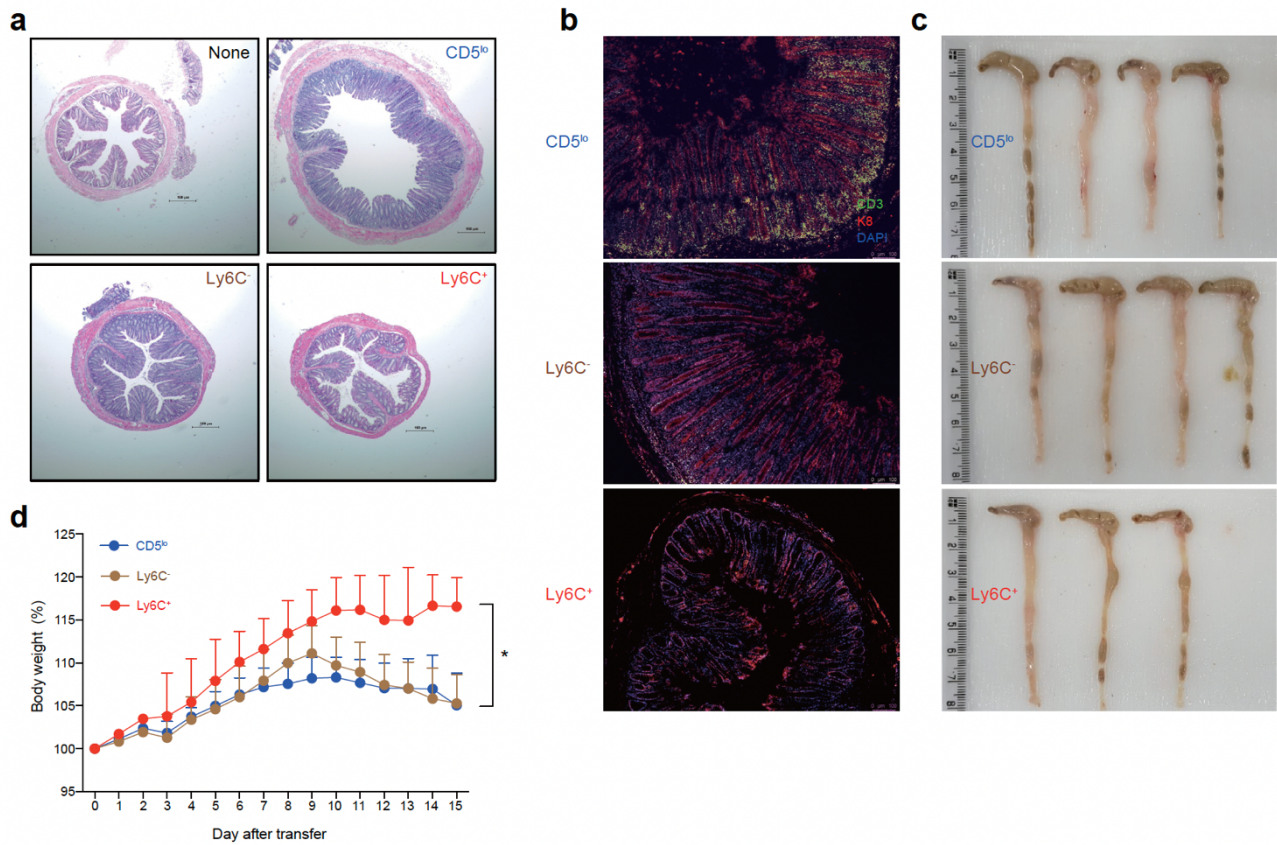

**Extended Data Fig. 1. Pathologic symptoms induced by different CD8<sup>+</sup> T<sub>N</sub> subsets in *Rag1*<sup>-/-</sup> mice.** **a–c**, Representative H & E staining images (**a**; magnification, 40×), and representative immunofluorescence images (**b**; magnification, 100×), and photo images (**c**) for day 14 LI. **d**, Body weight changes of *Rag1*<sup>-/-</sup> recipients after adoptive transfer with CD8<sup>+</sup> T<sub>N</sub> subsets. Data are representative of three (**a–d**) independent experiments (**a–c**, n=3–5; and **d**, n=6 mice/experiment) and presented as the mean ± SD (**d**). Statistical significance by Mann-Whitney test. \*, *P* < 0.05; \*\*, *P* < 0.01; \*\*\*, *P* < 0.001; \*\*\*\*, *P* < 0.0001.

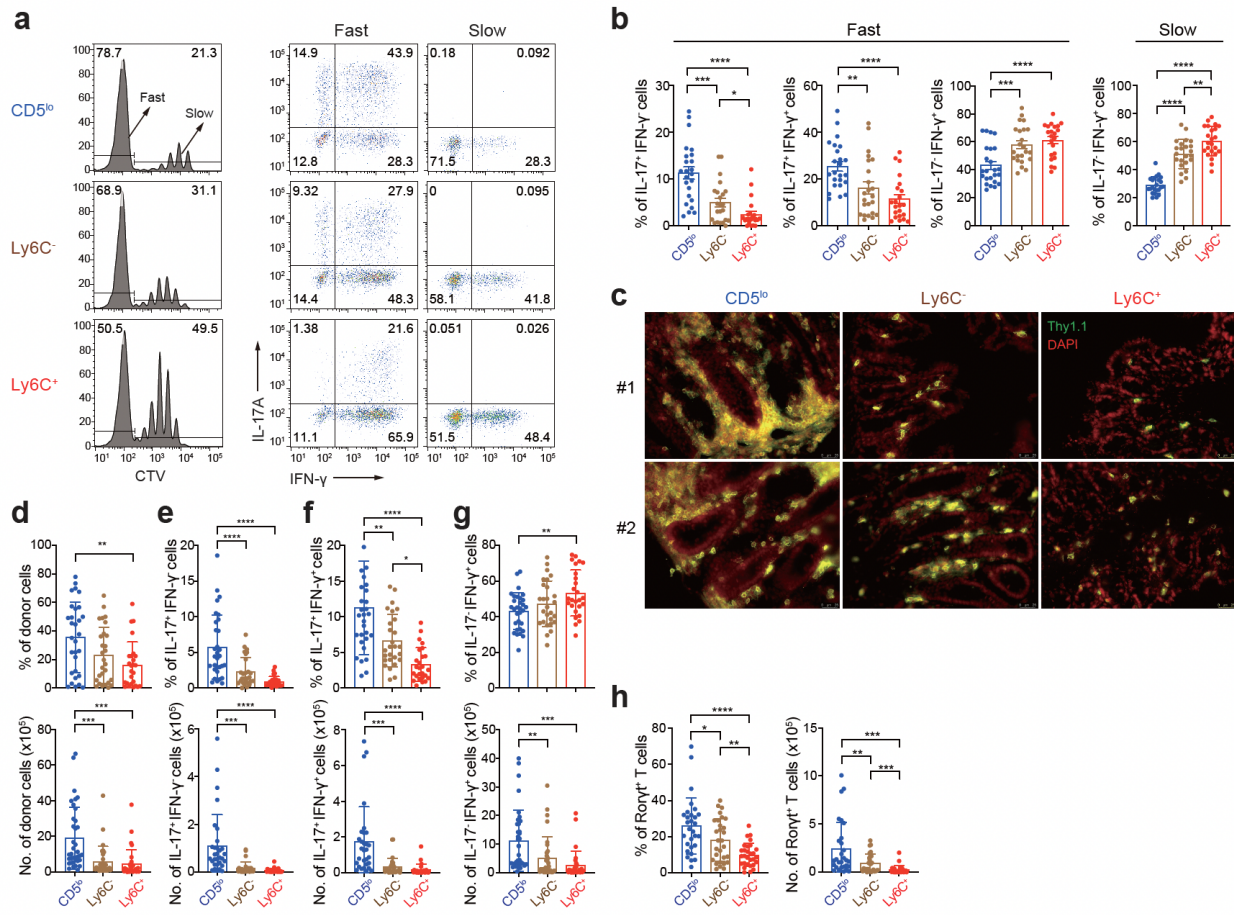

**Extended Data Fig. 2. Proliferation, colonic infiltration, and IL-17/IFN- $\gamma$  production of adoptively transferred CD8<sup>+</sup> T<sub>N</sub> subsets in *Rag1*<sup>-/-</sup> mice.** **a**, CTV-labeled CD5<sup>lo</sup>, Ly6C<sup>-</sup>, and Ly6C<sup>+</sup> CD8<sup>+</sup> T<sub>N</sub> subsets were adoptively transferred into *Rag1*<sup>-/-</sup> recipients and the proliferation of donor cells were analyzed at day 7 by measuring CTV dilution. Representative histograms (left) and FACS plots (right) show CTV dilution and IL-17A/IFN- $\gamma$  production, respectively, for fast and slow proliferative donor cells. **b**, Percentage of IL-17A<sup>+</sup>IFN- $\gamma$ <sup>-</sup>, IL-17A<sup>+</sup>IFN- $\gamma$ <sup>+</sup>, and IL-17A<sup>-</sup>IFN- $\gamma$ <sup>+</sup> cells for fast (left) and slow (right) proliferative donor subsets in day 7 mLN. **c-h**, Immunofluorescence images for Thy1.1<sup>+</sup> donor cells (**c**; magnification, 200 $\times$ ), the percentage and number of total donor (**d**), IL-17A<sup>+</sup>IFN- $\gamma$ <sup>-</sup> (**e**), IL-17A<sup>+</sup>IFN- $\gamma$ <sup>+</sup> (**f**), IL-17A<sup>-</sup>IFN- $\gamma$ <sup>+</sup> (**g**), and Rorγt<sup>+</sup> (**h**) cells from day 14 LI. Data are pooled from three (**b**), two (**c**), and four (**d-h**) independent experiments (n=6–8 mice/experiment) and presented as the mean  $\pm$  SEM (**b,d-h**). Statistical significance by two-way ANOVA Multiple comparisons. \*,  $P < 0.05$ ; \*\*,  $P < 0.01$ ; \*\*\*,  $P < 0.001$ ; \*\*\*\*,  $P < 0.0001$ .

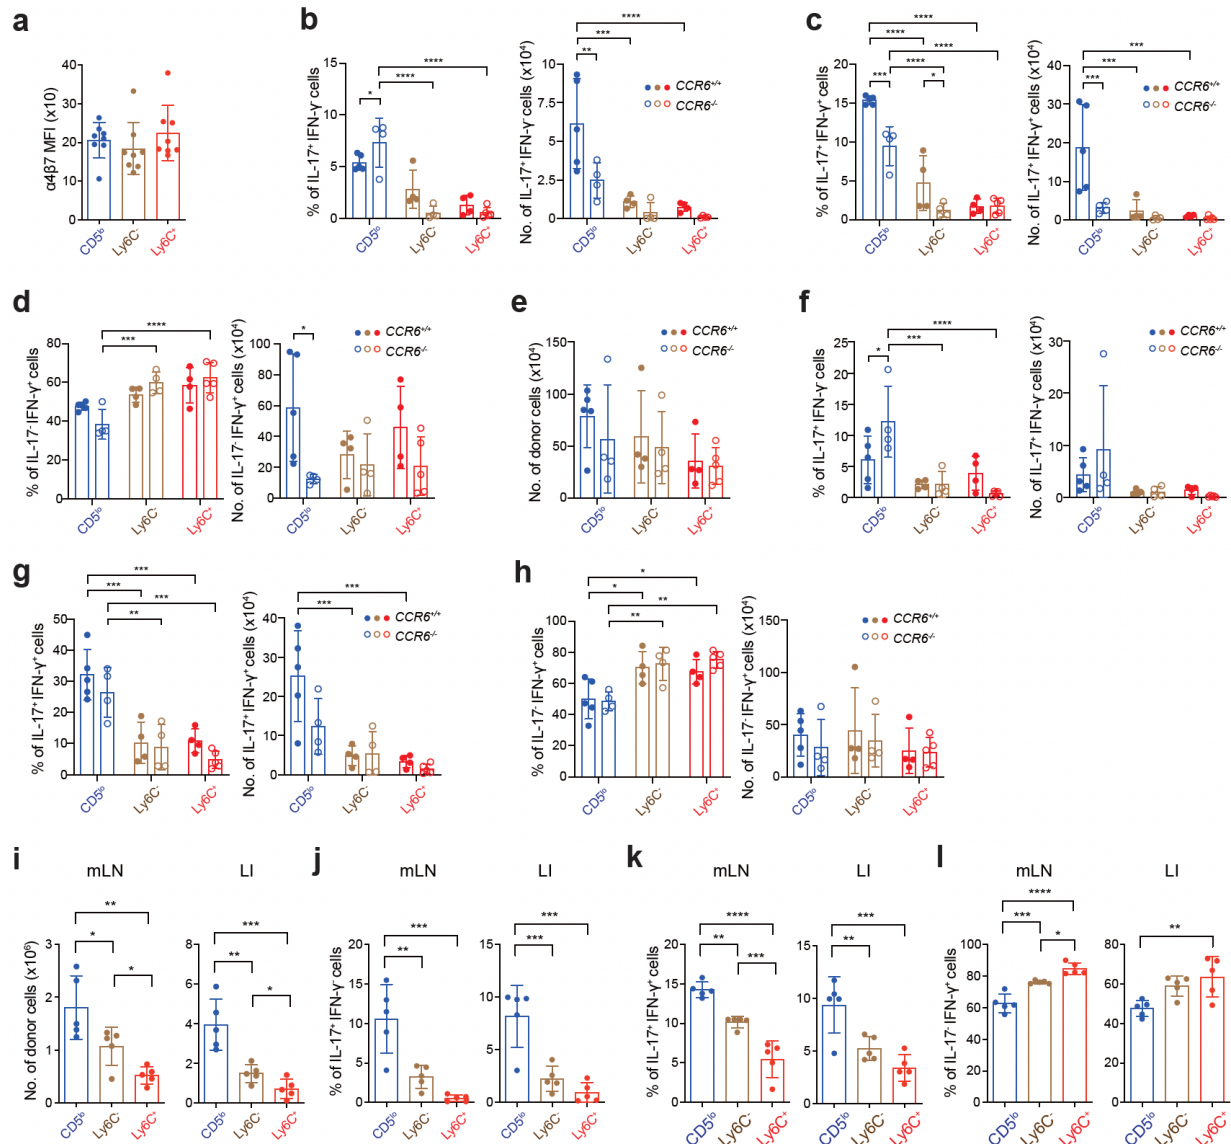

**Extended Data Fig. 3. The impact of CCR6 deficiency on IL-17/IFN- $\gamma$  production of adoptively transferred CD8<sup>+</sup> T<sub>N</sub> subsets in *Rag1*<sup>-/-</sup> mice.** **a**, Expression levels (MFI) of  $\alpha 4\beta 7$  of transferred donor subsets from day 7 mLN. **b–h**, Percentage and number of IL-17A<sup>+</sup>IFN- $\gamma$ <sup>-</sup> (**b,f**), IL-17A<sup>+</sup>IFN- $\gamma$ <sup>+</sup> (**c,g**), and IL-17A<sup>-</sup>IFN- $\gamma$ <sup>+</sup> (**d,h**) cells, and number of each donor subset (**e**) analyzed in LI (**b–d**) and mLN (**e–h**) at day 14 after adoptive transfer with either *Ccr6*<sup>+/+</sup> or *Ccr6*<sup>-/-</sup> CD8<sup>+</sup> T<sub>N</sub> subsets. **i–l**, Number of donor cells (**i**) and the percentage of IL-17A<sup>+</sup>IFN- $\gamma$ <sup>-</sup> (**j**), IL-17A<sup>+</sup>IFN- $\gamma$ <sup>+</sup> (**k**), and IL-17A<sup>-</sup>IFN- $\gamma$ <sup>+</sup> (**l**) cells analyzed in LI at day 21 after transfer with *Ccr6*<sup>-/-</sup> CD8<sup>+</sup> T<sub>N</sub> subsets. Data are representative of two (**a–l**) independent experiments (**a**, n=5–7; **b–d**, n=8–9; **e–h**, n=4–5; and **i–l**, n=5–10 mice/experiment) and presented as the mean  $\pm$  SD (**a–l**). Statistical significance by two-way ANOVA Multiple comparisons. \*,  $P < 0.05$ ; \*\*,  $P < 0.01$ ; \*\*\*,  $P < 0.001$ ; \*\*\*\*,  $P < 0.0001$ .



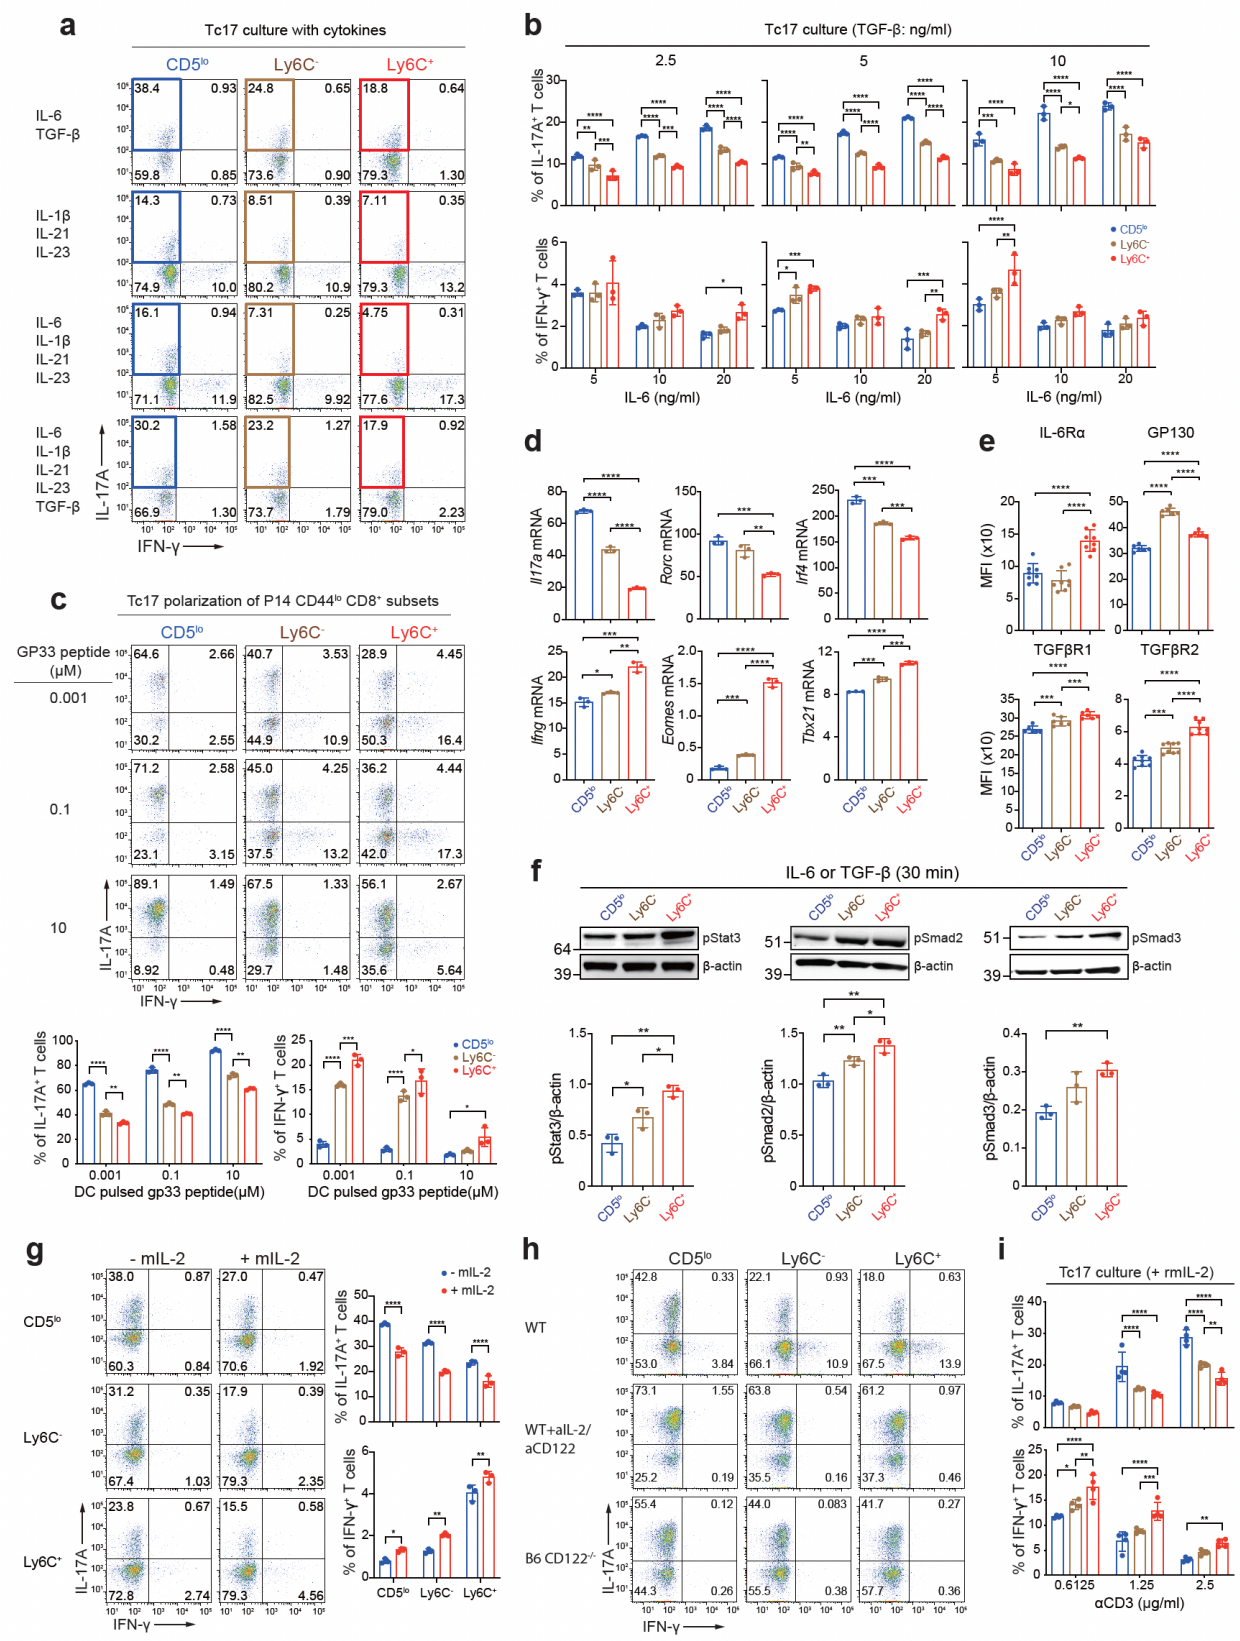

**Extended Data Fig. 4. Differential Tc17-skewing potential of CD8<sup>+</sup> T<sub>N</sub> subsets under various Tc17-polarizing conditions *in vitro*.** a, Representative FACS plots for IL-17A/IFN-γ production after

*in vitro* culture with B6 CD8<sup>+</sup> T<sub>N</sub> subsets under various Tc17-polarizing conditions. **b**, Percentage of IL-17A<sup>+</sup> and IFN- $\gamma$ <sup>+</sup> cells after Tc17-polarizing culture with B6 CD8<sup>+</sup> T<sub>N</sub> subsets in the presence of various concentrations of IL-6 and TGF- $\beta$ . **c**, Representative FACS plots for IL-17A/IFN- $\gamma$  production from P14 CD8<sup>+</sup> T<sub>N</sub> subsets stimulated with GP33 peptide-pulsed dendritic cells under Tc17-polarizing condition. **d**, qRT-PCR data for *Il17a*, *Rorc*, *Irf4*, *Ifng*, *Eomes*, and *Tbx21* after Tc17-polarizing culture with B6 CD8<sup>+</sup> T<sub>N</sub> subsets. **e**, Expression levels (MFI) of IL-6R $\alpha$ , GP130, TGF $\beta$ RI, and TGF $\beta$ RII on B6 CD8<sup>+</sup> T<sub>N</sub> subsets (n=6–8 mice/group). **f**, Levels of p-STAT3, p-SMAD2, and p-SMAD3 (shown in representative blot images, top, and intensity relative to  $\beta$ -actin, bottom). **g**, Representative FACS plots for IL-17A/IFN- $\gamma$  production (left) and the percentage of IL-17A<sup>+</sup> and IFN- $\gamma$ <sup>+</sup> cells (right) after Tc17-polarizing culture with B6 CD8<sup>+</sup> T<sub>N</sub> subsets in the presence or absence of rmIL-2. **h**, Representative FACS plots for IL-17A/IFN- $\gamma$  production after Tc17-polarizing culture with B6 CD8<sup>+</sup> T<sub>N</sub> subsets in the presence (middle) or absence (top) of anti-IL-2/CD122 or with *Cd122*<sup>-/-</sup> CD8<sup>+</sup> T<sub>N</sub> subsets (bottom). **i**, Percentage of IL-17A<sup>+</sup> and IFN- $\gamma$ <sup>+</sup> cells after Tc17-polarizing culture of B6 CD8<sup>+</sup> T<sub>N</sub> subsets with various concentrations of anti-CD3 and rmIL-2. Data is representative of two to three independent experiments (**a–i**) and presented as the mean  $\pm$  SD (**b–g,i**). Statistical significance by two-way ANOVA Multiple comparisons. \*,  $P < 0.05$ ; \*\*,  $P < 0.01$ ; \*\*\*,  $P < 0.001$ ; \*\*\*\*,  $P < 0.0001$ .

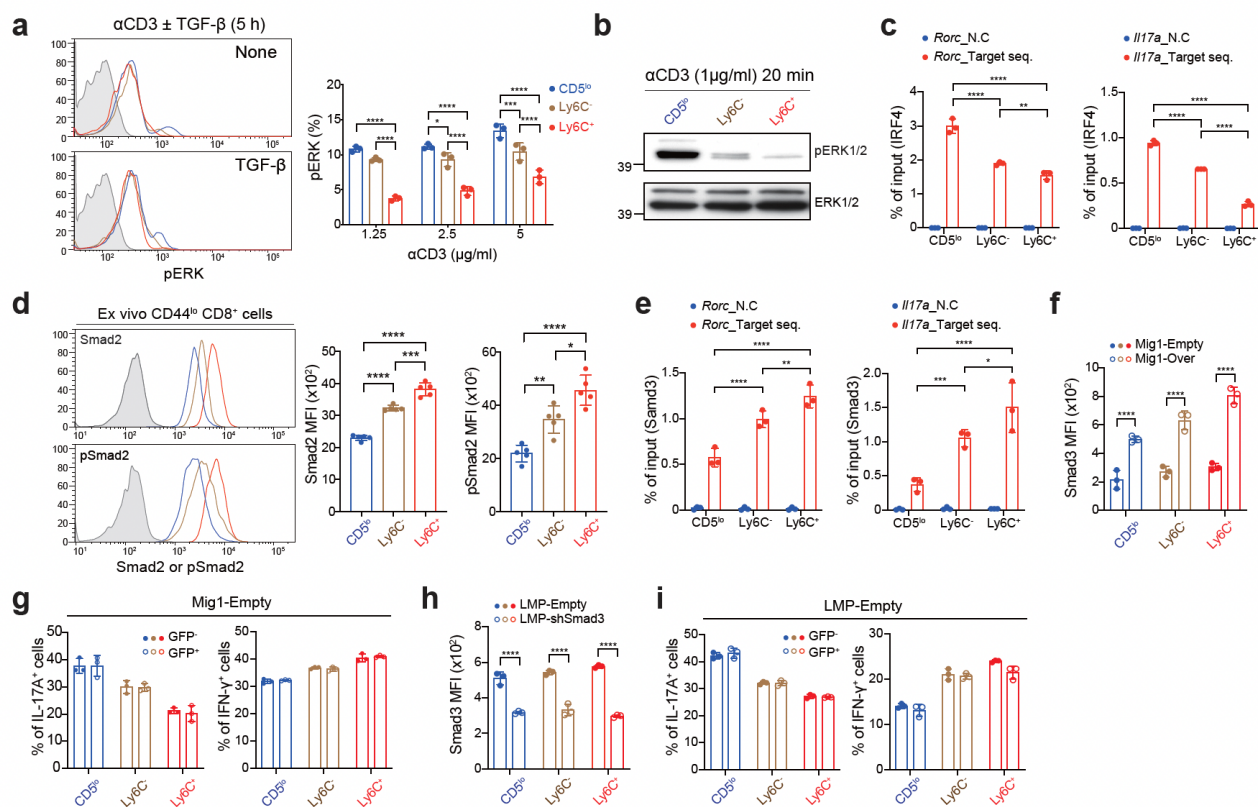

**Extended Data Fig. 5. Differential levels of TCR-induced ERK activation and endogenous SMAD2 expression in CD8<sup>+</sup> T<sub>N</sub> subsets.** **a**, Histogram (left) and percentage (right) for p-ERK expression among CD8<sup>+</sup> T<sub>N</sub> subsets stimulated with either anti-CD3 in the presence or absence of TGF-β (left) or with various concentrations of anti-CD3 (right). **b**, Representative blot images of p-ERK after 20 min stimulation with anti-CD3. **c**, B6 CD8<sup>+</sup> T<sub>N</sub> subsets were activated under Tc17-polarizing conditions for 72 h and subjected to ChIP using IRF4 antibody. Eluted DNA was analyzed by qPCR. **d**, Endogenous levels of SMAD2 and p-SMAD2 in *ex vivo* B6 CD8<sup>+</sup> T<sub>N</sub> subsets shown in histogram (left) and MFI (right) (n=5 mice/group). **e**, B6 CD8<sup>+</sup> T<sub>N</sub> subsets were activated under Tc17-polarizing conditions for 72 h and subjected to ChIP using SMAD3 antibody. Eluted DNA was analyzed by qPCR. **f**, MFI levels of SMAD3 from Tc17-polarized CD8<sup>+</sup> T<sub>N</sub> subsets transduced with either MigR-1 control (empty) or MigR-1 vector encoding *SMAD3* (over). **g**, Percentage of IL-17A<sup>+</sup> and IFN-γ<sup>+</sup> cells in GFP<sup>-</sup> and GFP<sup>+</sup> cells transduced with MigR-1 empty vector control. **h**, MFI levels of SMAD3 for Tc17-polarized CD8<sup>+</sup> T<sub>N</sub> subsets transduced with either LMP empty vector control or LMP vector containing *SMAD3* shRNA. **i**, Percentage of IL-17A<sup>+</sup> and IFN-γ<sup>+</sup> cells in GFP<sup>-</sup> or GFP<sup>+</sup> cells transduced with LMP empty vector control. Data are representative of two to three independent experiments (**a-i**) and presented as the mean ± SD (**a,c-i**). Statistical significance by two-way ANOVA Multiple comparisons. \*, *P* < 0.05; \*\*, *P* < 0.01; \*\*\*, *P* < 0.001; \*\*\*\*, *P* < 0.0001.

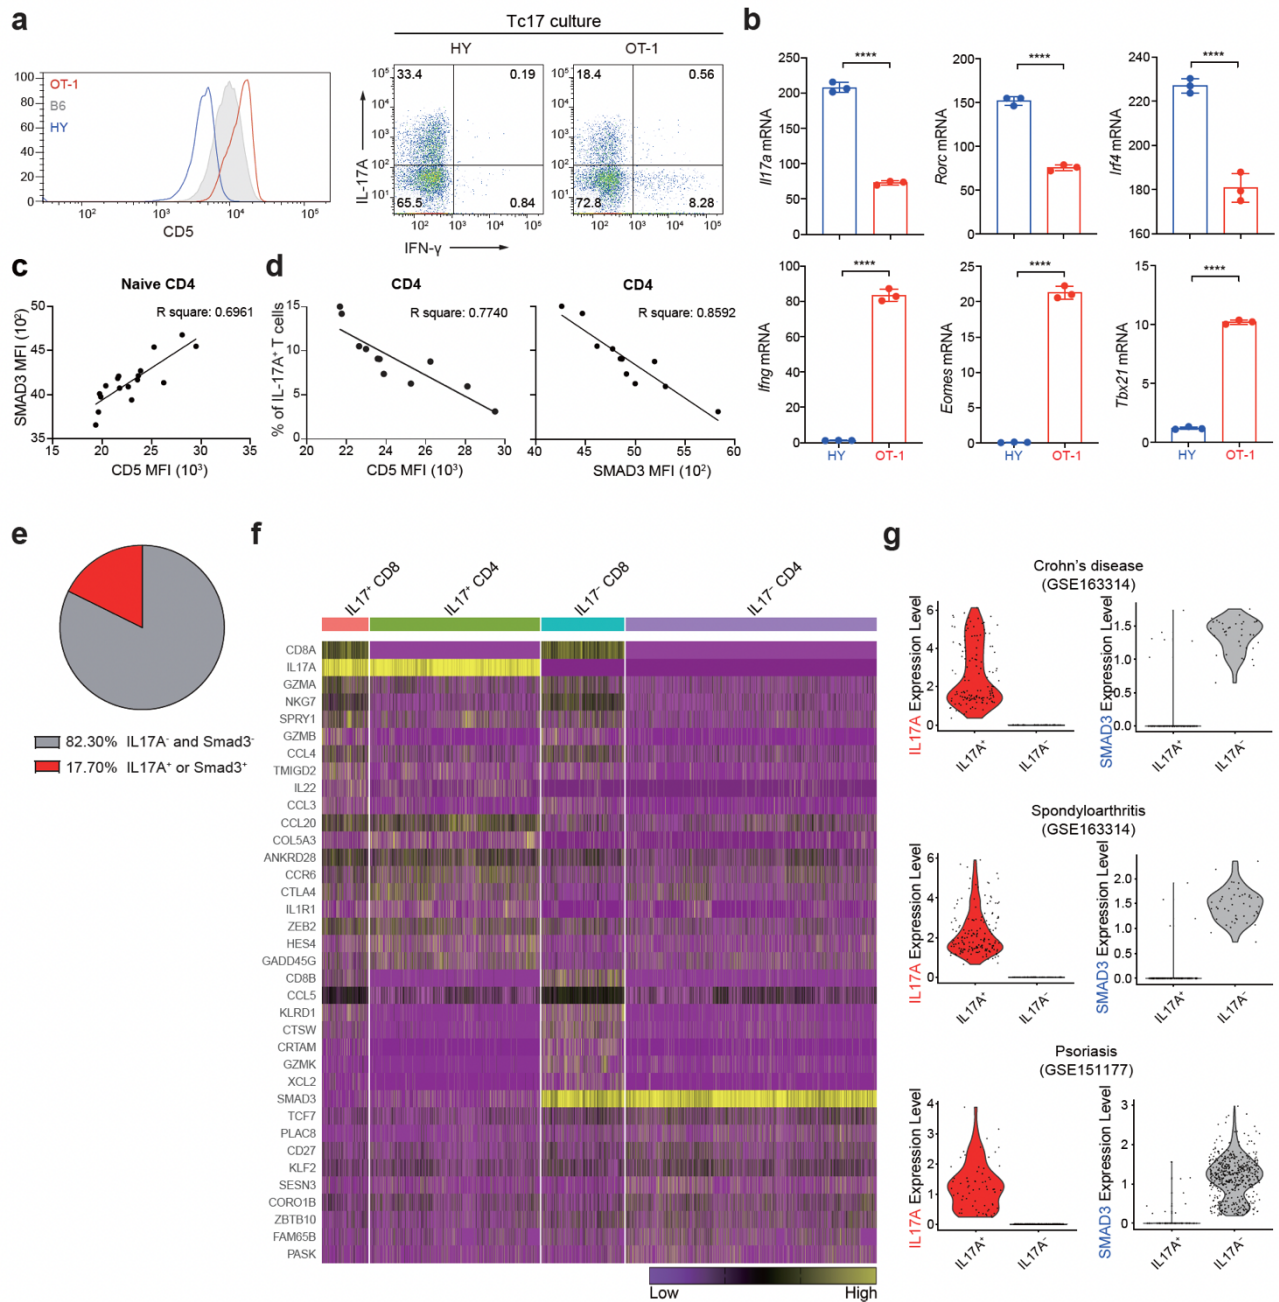

**Extended Data Fig. 6. Inverse relationship between CD5 and SMAD3 expression and Tc17 differentiation potential in mice and humans.** **a**, Expression levels of CD5 shown in histogram for HY and OT-1 *ex vivo* (left), and representative FACS plots for IL-17A/IFN- $\gamma$  production (right) after Tc17-polarizing culture. **b**, qRT-PCR data for *Il17a*, *Rorc*, *Irf4*, *Ifng*, *Eomes*, and *Tbx21* analyzed for Tc17-polarized HY and OT-1 CD8<sup>+</sup> T<sub>N</sub> cells. **c**, Relationship between CD5 and SMAD3 levels *ex vivo* in CD4<sup>+</sup> T<sub>N</sub> populations from healthy human PBMC (n=17). **d**, Relationship between CD5 (left) or SMAD3 (right) levels *ex vivo* and the percentages of IL-17A<sup>+</sup> cells after Th17-polarizing cultures with human CD4<sup>+</sup> T<sub>N</sub> populations (n=11). **e,f**, *IL17A* and *SMAD3* expression profiles in CD3<sup>+</sup> cells (**e**) and



heatmap of differentially expressed genes of  $IL17^+CD8^+$ ,  $IL17^+CD4^+$ ,  $IL-17^-CD8^+$ , and  $IL17^-CD4^+$  T cells (**f**) in public single cell RNA-sequencing (scRNA-seq) data set (GSE162335) performed with patients' tissues (lamina propria) with UC. **g**,  $IL17A$  and  $SMAD3$  expression of  $CD3^+$  cells that are either  $IL17A^+$  or  $SMAD3^+$  in public scRNA-seq data sets (GSE162335, GSE163314, and GSE151177) performed with tissues from patients with Crohn's disease, Spondyloarthritis, and Psoriasis, respectively. Data are representative (**a,b**) or pooled (**c,d**) from two to three independent experiments and presented as the mean  $\pm$  SD (**d**). Statistical significance by simple linear regression two-way ANOVA Multiple comparisons. \*,  $P < 0.05$ ; \*\*,  $P < 0.01$ ; \*\*\*,  $P < 0.001$ ; \*\*\*\*,  $P < 0.0001$ .

**Supplementary Table 1.**

| <b>Antibodies</b>                              | <b>Manufacturer</b> | <b>Catalog #</b> |
|------------------------------------------------|---------------------|------------------|
| anti-CD16/32                                   | ebioscience         | 14-0161-82       |
| anti-V $\beta$ 2 (FITC); clone B20.6           | Biolegend           | 127906           |
| anti-V $\beta$ 3 (FITC); clone KJ25            | BD Bioscience       | 553208           |
| anti-V $\beta$ 4 (FITC); clone KT4             | BD Bioscience       | 553365           |
| anti-V $\beta$ 5.1/5.2 (FITC); clone MR9-4     | ThermoFisher        | 11-5796-80       |
| anti-V $\beta$ 6 (FITC); clone RR4-7           | BD Bioscience       | 553193           |
| anti-V $\beta$ 7 (FITC); clone TR310           | Biolegend           | 118306           |
| anti-V $\beta$ 8.3 (FITC); clone 1B3.3         | BD Bioscience       | 553663           |
| anti-V $\beta$ 9 (FITC); clone MR10-2          | BD Bioscience       | 553201           |
| anti-V $\beta$ 10b (FITC); clone B21.5         | BD Bioscience       | 553284           |
| anti-V $\beta$ 11 (FITC); clone RR3-15         | BD Bioscience       | 553197           |
| anti-V $\beta$ 12 (FITC); clone MR11-1         | BD Bioscience       | 553300           |
| anti-V $\beta$ 13 (FITC); clone MR12-3         | BD Bioscience       | 553204           |
| anti-V $\beta$ 14 (FITC); clone 14-2           | BD Bioscience       | 553258           |
| anti-V $\beta$ 17a (FITC); clone KJ23          | BD Bioscience       | 553212           |
| anti-CD3 $\epsilon$ (PB); clone 145-2C11       | Biolegend           | 100334           |
| anti-CD5 (PE); clone 53-7.3                    | Invitrogen          | 12-0051-83       |
| anti-CD44 (eF450); clone IM7                   | Invitrogen          | 48-0441-82       |
| anti-CD62L (PE); clone MEL-14                  | Biolegend           | 104408           |
| anti-CD45.1 (BUV395); clone A20                | BD Bioscience       | 565212           |
| anti-CD45.2 (PB); clone 104                    | Biolegend           | 109820           |
| anti-CD90.1 (FITC); clone HIS51                | Invitrogen          | 11-0900-85       |
| anti-CD90.2 (PE) (53-2.1)                      | ebioscience         | 15298609         |
| anti-Ly6C (PE-cy7) (HK1.4)                     | ebioscience         | 15518606         |
| anti-CD8 $\alpha$ (APC) (53-6.7)               | Tonbo               | 20-0081-U100     |
| anti-CD126 (APC) (D7715A7)                     | Biolegend           | 115812           |
| anti-GP130 (APC); clone KGP130                 | ThermoFisher        | 17-1302-82       |
| anti-TGFBRI (APC); clone 141231                | R&D biosystems      | FAB5871A         |
| anti-TGFBRII (PE); polyclonal                  | R&D biosystems      | FAB532P          |
| anti- $\alpha$ 4 $\beta$ 7 (APC); clone DATK32 | ThermoFisher        | 17-5887-82       |
| anti-CD195 (PE); clone HM-CCR5                 | ebioscience         | 12-1951-81       |
| anti-CD196 (PE); clone 29-2L17                 | Biolegend           | 129804           |
| anti-IFN- $\gamma$ (APC); clone XMG1.2         | Invitrogen          | 17-7311-82       |
| anti-IL-17A (PE); clone eBio17B7               | Invitrogen          | 12-7177-81       |
| anti-Eomes (APC)                               | ebioscience         | 50-4875-82       |
| anti-Ror $\gamma$ t (PE); clone B2D            | Invitrogen          | 12-6981-82       |
| anti-Ror $\gamma$ t (PE-eF610); clone B2D      | Invitrogen          | 61-6981-82       |
| anti-IRF4 (APC); clone IRF4.3E4                | Biolegend           | 646408           |
| anti-GM-CSF (PE); clone MP1-22E9               | Invitrogen          | 12-7331-82       |
| anti-pERK (PE); clone py204                    | BD Bioscience       | 612566           |
| anti-hCD3 (APC-cy7); clone HIT3a               | Biolegend           | 300318           |
| anti-hCD4 (APC); clone A161A1                  | Biolegend           | 357408           |
| anti-hCD5 (PE); clone L17F12                   | Biolegend           | 364014           |
| anti-hCD8 (FITC); clone SK1                    | Biolegend           | 344704           |
| anti-hCD45RA (PB); clone HI100                 | Biolegend           | 304123           |
| anti-hCCR7 (PE-cy7); clone G043H7              | Biolegend           | 353225           |
| anti-hIFN- $\gamma$ (APC); clone B27           | Biolegend           | 506510           |
| anti-hIL-17A (PE); clone BL168                 | Biolegend           | 512306           |

**Supplementary Table 2.**

| Rorc region (IRF4)     | Sense primer             | Antisense primer      |
|------------------------|--------------------------|-----------------------|
| N.C_-1576 ~ -1737      | TGAGCACACTATCACTCTCTTCAG | TGACCCTTGGGTAGGAGAGA  |
| Target_+10747 ~ +10824 | GGGCCCTGAGATGGTAAGTT     | GGGTGCTGAGTAATCACAGGA |

| <i>Il17a</i> region (IRF4) | Sense primer          | Antisense primer           |
|----------------------------|-----------------------|----------------------------|
| N.C_-3387 ~ -3523          | CTCCCATGTGGTCATTATTGC | GTGTCCTTAGGTCCTAAATGTAGG   |
| Target_-1592~-1815         | AATCCATGGAGCTGGAGAGA  | TTTTTATACAACATAGGTCTTCATGG |

| <i>Rorc</i> region (Smad3) | Sense primer         | Antisense primer     |
|----------------------------|----------------------|----------------------|
| N.C_-727 ~ -881            | GGTTGTTGGGTAAGCAGGAA | CACGACCCCGTAATTCTGTT |
| Target_-862 ~ -1181        | CAACGGTGGAGAATGGAATG | TTCCTGCTTACCCAACAACC |

| <i>Il17a</i> region (Smad3) | Sense primer         | Antisense primer       |
|-----------------------------|----------------------|------------------------|
| N.C_-1211 ~ -984            | CAGGGATAATGCCAAGGGTA | AGCATGAGGTGGACCGATAG   |
| Target_-11~-185             | AACTTCTGCCCTTCCCATCT | GCTCCTTTCTCTTTTTATACGG |

**Smad3 overexpression**

|         |                               |
|---------|-------------------------------|
| Forward | GACTCGAGATGTCGTCCATCCTGCCC    |
| Reverse | GAGAATTCCTAAGACACACTTTAACAGCG |

|                          |                                                                                              |
|--------------------------|----------------------------------------------------------------------------------------------|
| shRNA sequence for Smad3 | TGCTGTTGACAGTGAGCGAACGCAGAACGTGAACACCAAGTAG<br>TGAAGCCACAGATGTACTTGGTGTTCACGTTCTGCGTGTGCCTAC |
|--------------------------|----------------------------------------------------------------------------------------------|
